# Supplementary material for: Discovering key regulatory mechanisms from single-factor and multi-factor regulations in glioblastoma utilizing multi-dimensional data
Source: Royal Society of Chemistry journal article supplement (doi:10.1039/c5mb00264h), 2015-05-27
Supplement: c5mb00264h1.pdf [file c5mb00264h1.pdf]

**Discovering key regulatory mechanisms from single-factor  
and multi-factor regulations in glioblastoma utilizing multi-  
dimensional data**

**Chen Peng, Yi Shen, Mengqu Ge, Minghui Wang, Ao Li**

# 1. Supplementary material and method

## *Overview of the method*

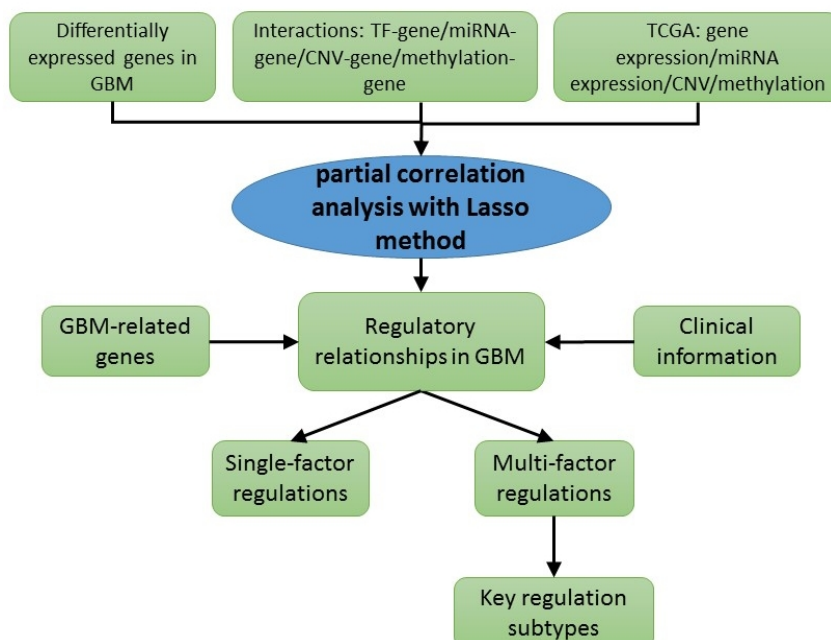

The flow chart of the method in this study is shown above. Firstly we extracted differentially expressed genes in GBM based on gene expressions in normal and tumor. Secondly we extracted the predicted/possible regulators of each differentially expressed gene according to the prior information. Then the TCGA data containing gene expression, miRNA expression, CNV and methylation about these regulators and the differentially expressed target genes were imported to partial correlation analysis with Lasso method as input. The results of regulatory relationships were further classified into two types: single-factor and multi-factor and further analysis of multi-factor regulations indicate three key regulation subtypes. In addition, GBM-related genes with evidence of involvement in GBM were used for investigating the

genes related to GBM in the results of regulatory relationships and the clinical information was also used in subsequent survival analysis.

### ***Predicted regulatory interactions***

Four types of regulatory relationships were investigated in this study: TF regulation (TF-gene), miRNA regulation (miRNA-gene), CNV regulation (CNV-gene) and methylation regulation (methylation-gene). Candidate TF-gene and miRNA-gene interactions were retrieved from [1], which have totally 130,338 TF-gene interactions including 214 human TFs, 16,534 target genes and 118,408 miRNA-gene interactions with 10,255 target genes and 276 human miRNAs. The regulations of CNV and methylation were also assigned to each gene if its CNV and methylation values were available. The integration of above predicted interactions is regarded as prior information in this study. Since these prior information usually contains false positives, we further used partial correlation analysis with Lasso method to solve this problem.

### ***Gene expression, miRNA expression, CNV, methylation and clinical data for GBM***

We used multi-dimensional data of GBM in this study, which include four 'omics': miRNA expression, gene expression, CNV and methylation. To obtain these data we resorted to TCGA [2], which produces unprecedented multi-dimensional data of cancers. First we downloaded the normalized data ('level 3') of GBM patients for CNV, methylation, miRNA expression and gene expression. Then we extracted totally 277 GBM patients in these data, which contain the information of all these four 'omics' (i.e., each has one set of CNV, one set of methylation, one set of miRNA

expression and one set of gene expression). For differential expression analysis, we additionally downloaded the gene expression data of organ-specific normal samples. Besides, we also obtained all available public survival data for each patient. All these data were provided by the GBM catalog in TCGA Data Portal (<https://tcga-data.nci.nih.gov/tcga>). Tumor samples were taken from the participants in MD Anderson while normal samples from donor tissue of individuals that did not have cancer. As for gene expression, miRNA expression and methylation, we directly extract the values of corresponding samples for each gene. Since the CNV profiles only provide mean values of chromosome segments, we further downloaded 'refGene.txt' from UCSC (<http://genome.ucsc.edu/>) that contains the chromosomal location of 44,914 genes and assigned the average intensity value of CNV to each gene. Finally, the four 'omics' data of GBM patients as well as the gene expression data of organ-specific normal samples were transformed into five normalized matrixes in which a row represent a gene and a column represent a sample. The data preprocessing process was carried out with matlab.

#### ***GBM-related genes with evidence of involvement in GBM***

As for GBM-related genes with evidence of involvement in GBM, we resorted to six sources: the Online Mendelian Inheritance in Man (OMIM) [3], two genome-wide association studies [4-5], TCGA [2], the Catalogue Of Somatic Mutations In Cancer (COSMIC, version 67) [6], the Genetic Association Database (GAD) [7] and one integrative genomic analysis of GBM [8]. The collection were performed following the procedure described in [9]. Firstly, we downloaded gene information from

COSMIC database (version 66, released on 25th July 2013, <http://cancer.sanger.ac.uk/cosmic>). For each gene, we defined the number of samples that were labeled with ‘GBM’ as  $D$  and the number of samples with positive mutation records as  $d$ . Then 556 genes with  $d$  no less than 2 and a percentage ( $d/D$ ) no less than 3% were obtained. Secondly, from supplementary Table 6 of [2] ([data.nci.nih.gov/docs/somatic\\_mutations/tcga\\_mutations.htm](http://data.nci.nih.gov/docs/somatic_mutations/tcga_mutations.htm)), we retrieved 215 genes with validated non-silent somatic mutations. In addition to above resources, 3 GBM-related genes obtained by searching OMIM with key word “glioblastoma” (<http://www.ncbi.nlm.nih.gov/omim>) [3] and 5 GBM-related genes that have positive association reports from GAD (updated on 1th Sepetember 2014, <http://geneticassociationdb.nih.gov>) [7] were collected. Besides, we retrieved 42 genes from supplementary Table 7 of [8], which have accumulated mutations at significant frequencies, and 6 risk genes for GBM from 2 glioma genome-wide association studies [4] and [5]. After integrating these data and removing the duplicates, we finally got 760 experimentally validated GBM-related genes.

## Reference

1. Yu, H. *et al.* Combinatorial network of transcriptional regulation and microRNA regulation in human cancer. *BMC. SYST. BIOL.* **6**, 61 (2012).
2. McLendon, R. *et al.* Comprehensive genomic characterization defines human glioblastoma genes and core pathways. *Nature* **455**, 1061-1068 (2008).
3. Hamosh, A., Scott, A. F., Amberger, J. S., Bocchini, C. A. & McKusick, V. A. Online Mendelian Inheritance in Man (OMIM), a knowledgebase of human genes and genetic disorders. *Nucleic Acids Res.* **33**, D514-D517 (2005).
4. Shete, S. *et al.* Genome-wide association study identifies five susceptibility loci for glioma. *Nat. Genet.* **41**, 899-904 (2009).
5. Wrensch, M. *et al.* Variants in the CDKN2B and RTEL1 regions are associated

- with high-grade glioma susceptibility. *Nat. Genet.* **41**, 905-908 (2009).
6. Forbes, S. A. *et al.* COSMIC: mining complete cancer genomes in the Catalogue of Somatic Mutations in Cancer. *Nucleic Acids Res.* **39**, D945-D950 (2011).
  7. Becker, K. G., Barnes, K. C., Bright, T. J. & Wang, S. A. The genetic association database. *Nat. Genet.* **36**, 431-432 (2004).
  8. Parsons DW, Jones S, Zhang X, Lin JC, Leary RJ, *et al.* An integrated genomic analysis of human glioblastoma multiforme. *Science*, **321**: 1807-1812 (2008).
  9. Sun, J., Gong, X., Purow, B. & Zhao, Z. Uncovering microRNA and transcription factor mediated regulatory networks in glioblastoma. *PLoS Comput. Biol.* **8**, e1002488 (2012).

## 2. Supplementary Tables

Table S1 Detailed information of 164 experimentally validated GBM-related genes

| Gene name | <i>p</i> -value of differential expression | <i>q</i> -value after BN correction |
|-----------|--------------------------------------------|-------------------------------------|
| A2M       | 3.2E-08                                    | 2.4E-04                             |
| ABCC3     | 4.1E-26                                    | 4.1E-22                             |
| ABCC4     | 5.1E-13                                    | 4.6E-09                             |
| ABCC5     | 1.6E-08                                    | 1.3E-04                             |
| ACAN      | 9.6E-07                                    | 6.3E-03                             |
| ACTR3B    | 2.0E-08                                    | 1.5E-04                             |
| ADAM12    | 3.7E-07                                    | 2.5E-03                             |
| AIFM1     | 3.4E-07                                    | 2.4E-03                             |
| ANK2      | 4.9E-12                                    | 4.3E-08                             |
| ANXA1     | 1.9E-12                                    | 1.7E-08                             |
| ARHGEF6   | 5.0E-12                                    | 4.4E-08                             |
| ARNT2     | 2.3E-12                                    | 2.0E-08                             |
| ATM       | 8.5E-26                                    | 8.5E-22                             |
| ATP13A2   | 3.8E-08                                    | 2.8E-04                             |
| ATP6V1E1  | 2.0E-52                                    | 2.1E-48                             |
| ATP8B1    | 1.8E-07                                    | 1.2E-03                             |
| AURKB     | 5.0E-12                                    | 4.4E-08                             |
| BAI3      | 1.8E-11                                    | 1.6E-07                             |
| BAZ1A     | 2.4E-27                                    | 2.4E-23                             |
| BCL11A    | 6.1E-10                                    | 5.0E-06                             |
| BCL2L13   | 5.0E-13                                    | 4.6E-09                             |
| BCL6      | 9.0E-07                                    | 6.0E-03                             |
| CACNA1I   | 1.1E-07                                    | 7.8E-04                             |
| CAST      | 1.0E-19                                    | 9.9E-16                             |
| CCR5      | 1.6E-13                                    | 1.5E-09                             |
| CD46      | 1.6E-09                                    | 1.3E-05                             |
| CDK4      | 7.4E-11                                    | 6.4E-07                             |
| CENPF     | 1.6E-33                                    | 1.7E-29                             |
| CFI       | 9.0E-13                                    | 8.1E-09                             |
| CHD4      | 1.5E-08                                    | 1.1E-04                             |
| CHD5      | 6.7E-09                                    | 5.2E-05                             |
| CHEK1     | 6.7E-23                                    | 6.6E-19                             |
| CHEK2     | 1.3E-13                                    | 1.2E-09                             |
| CHL1      | 3.2E-07                                    | 2.2E-03                             |
| CNTN6     | 9.0E-08                                    | 6.5E-04                             |
| COG5      | 1.1E-07                                    | 8.0E-04                             |
| COL15A1   | 1.3E-10                                    | 1.1E-06                             |

|         |         |         |
|---------|---------|---------|
| COL1A1  | 2.4E-14 | 2.2E-10 |
| COL1A2  | 1.4E-06 | 9.3E-03 |
| COL4A2  | 8.1E-14 | 7.4E-10 |
| COL6A2  | 3.0E-22 | 3.0E-18 |
| CPS1    | 8.5E-07 | 5.6E-03 |
| CTBP2   | 6.5E-07 | 4.4E-03 |
| CYP46A1 | 1.6E-29 | 1.6E-25 |
| DARS2   | 1.7E-09 | 1.4E-05 |
| DDX1    | 9.7E-07 | 6.4E-03 |
| DHTKD1  | 2.1E-07 | 1.5E-03 |
| DNAH17  | 1.4E-06 | 9.0E-03 |
| DNAH9   | 2.3E-08 | 1.7E-04 |
| DUSP22  | 1.6E-07 | 1.1E-03 |
| DYNC1H1 | 2.3E-07 | 1.6E-03 |
| EGFR    | 3.0E-21 | 2.9E-17 |
| EIF4G2  | 3.2E-10 | 2.7E-06 |
| ELAVL2  | 6.8E-07 | 4.6E-03 |
| ENPP2   | 1.4E-08 | 1.1E-04 |
| ERBB2   | 3.4E-09 | 2.7E-05 |
| FBXW7   | 1.8E-11 | 1.6E-07 |
| FEZ1    | 1.0E-10 | 8.6E-07 |
| FGFR2   | 1.5E-07 | 1.1E-03 |
| FLI1    | 2.0E-08 | 1.5E-04 |
| FN1     | 1.8E-10 | 1.5E-06 |
| FUBP1   | 5.6E-09 | 4.4E-05 |
| GALNT3  | 4.3E-08 | 3.2E-04 |
| GNAI1   | 3.9E-07 | 2.7E-03 |
| GRIA2   | 1.3E-31 | 1.3E-27 |
| GRM3    | 3.4E-21 | 3.4E-17 |
| GSTM5   | 1.0E-06 | 6.7E-03 |
| GYPC    | 9.2E-08 | 6.6E-04 |
| H3F3A   | 2.1E-10 | 1.7E-06 |
| HERC1   | 6.6E-09 | 5.2E-05 |
| HIF1A   | 9.0E-21 | 8.9E-17 |
| IBTK    | 1.5E-07 | 1.1E-03 |
| ID3     | 6.6E-09 | 5.2E-05 |
| IDH1    | 8.8E-11 | 7.5E-07 |
| IQGAP1  | 2.2E-20 | 2.2E-16 |
| ITGAV   | 3.9E-18 | 3.8E-14 |
| JAG1    | 6.4E-19 | 6.3E-15 |
| KCNJ12  | 3.5E-18 | 3.4E-14 |
| KLF6    | 3.7E-17 | 3.6E-13 |



|          |         |         |
|----------|---------|---------|
| KNTC1    | 4.0E-14 | 3.7E-10 |
| KPNA2    | 3.2E-13 | 2.9E-09 |
| KRAS     | 8.0E-11 | 6.8E-07 |
| KRIT1    | 6.4E-15 | 6.0E-11 |
| KTN1     | 3.3E-09 | 2.7E-05 |
| LGALS3BP | 6.4E-13 | 5.8E-09 |
| LRRN2    | 1.2E-07 | 8.8E-04 |
| LTF      | 1.1E-19 | 1.1E-15 |
| LYN      | 2.1E-08 | 1.6E-04 |
| MAN2B1   | 1.2E-32 | 1.2E-28 |
| MAP3K6   | 1.4E-09 | 1.1E-05 |
| MAPK7    | 8.0E-14 | 7.4E-10 |
| MAPK9    | 1.4E-07 | 9.8E-04 |
| MEOX2    | 1.5E-16 | 1.4E-12 |
| MLH1     | 2.1E-17 | 2.0E-13 |
| MSH6     | 1.1E-09 | 9.2E-06 |
| MSR1     | 2.1E-08 | 1.6E-04 |
| MYO1B    | 2.1E-13 | 1.9E-09 |
| MYO5C    | 1.6E-09 | 1.3E-05 |
| NBN      | 7.4E-18 | 7.2E-14 |
| NELL2    | 8.8E-49 | 9.0E-45 |
| NOTCH1   | 6.4E-11 | 5.5E-07 |
| NOTCH2   | 5.0E-13 | 4.6E-09 |
| NPTXR    | 7.1E-08 | 5.2E-04 |
| NRP1     | 1.2E-22 | 1.2E-18 |
| NTRK3    | 4.6E-09 | 3.7E-05 |
| NUP205   | 5.7E-16 | 5.4E-12 |
| NUP88    | 2.2E-16 | 2.1E-12 |
| PDGFRB   | 6.4E-10 | 5.3E-06 |
| PKD2     | 1.3E-06 | 8.7E-03 |
| PDPK1    | 3.2E-11 | 2.8E-07 |
| PIK3C3   | 6.9E-13 | 6.2E-09 |
| PIK3R1   | 2.1E-10 | 1.8E-06 |
| PIM1     | 7.5E-09 | 5.9E-05 |
| PMS2     | 3.6E-07 | 2.5E-03 |
| PRKD2    | 3.7E-26 | 3.7E-22 |
| PRKDC    | 2.4E-11 | 2.1E-07 |
| QKI      | 3.4E-25 | 3.4E-21 |
| QSOX1    | 6.7E-09 | 5.3E-05 |
| RB1      | 7.2E-14 | 6.6E-10 |
| RHOT1    | 2.1E-08 | 1.6E-04 |
| RIMBP2   | 2.1E-11 | 1.8E-07 |

|           |         |         |
|-----------|---------|---------|
| RIMS2     | 1.1E-13 | 1.0E-09 |
| RINT1     | 7.7E-09 | 6.0E-05 |
| ROS1      | 5.9E-07 | 4.0E-03 |
| RPN1      | 7.1E-23 | 7.0E-19 |
| RSF1      | 7.2E-09 | 5.6E-05 |
| RTN1      | 4.1E-81 | 4.2E-77 |
| RUNX1T1   | 3.5E-08 | 2.6E-04 |
| RYR2      | 1.5E-09 | 1.2E-05 |
| SHMT2     | 2.4E-21 | 2.3E-17 |
| SIRPA     | 1.3E-09 | 1.1E-05 |
| SLC25A13  | 2.9E-43 | 3.0E-39 |
| SLCO2B1   | 1.1E-08 | 8.5E-05 |
| SMAD4     | 5.9E-25 | 5.8E-21 |
| SMURF2    | 6.5E-07 | 4.4E-03 |
| SNX13     | 1.1E-09 | 8.6E-06 |
| SOX11     | 1.8E-28 | 1.8E-24 |
| SPTBN1    | 8.1E-08 | 5.9E-04 |
| ST7       | 4.7E-08 | 3.5E-04 |
| STAT1     | 1.9E-13 | 1.8E-09 |
| STAT3     | 1.2E-09 | 9.4E-06 |
| STEAP3    | 2.7E-44 | 2.7E-40 |
| SV2B      | 2.3E-28 | 2.4E-24 |
| SYNE1     | 4.6E-08 | 3.4E-04 |
| SYP       | 8.7E-09 | 6.8E-05 |
| TAF1B     | 3.6E-10 | 3.0E-06 |
| TBK1      | 1.1E-06 | 7.3E-03 |
| TCF12     | 5.1E-14 | 4.7E-10 |
| TGFB2     | 5.2E-09 | 4.1E-05 |
| TIMP2     | 3.9E-14 | 3.6E-10 |
| TNFRSF11B | 5.0E-07 | 3.4E-03 |
| TNFSF4    | 6.4E-10 | 5.3E-06 |
| TOP1      | 5.5E-08 | 4.0E-04 |
| TP53      | 4.0E-33 | 4.1E-29 |
| TRIM24    | 1.2E-09 | 1.0E-05 |
| TRIM3     | 2.1E-14 | 2.0E-10 |
| TRMT5     | 1.4E-07 | 9.8E-04 |
| TRRAP     | 2.2E-07 | 1.5E-03 |
| TSC1      | 2.8E-07 | 1.9E-03 |
| UNG       | 2.9E-08 | 2.2E-04 |
| XPO1      | 6.7E-07 | 4.5E-03 |
| ZEB1      | 2.2E-07 | 1.6E-03 |

Table S2 Detailed results of pathway enrichment analysis of single-factor and multi-factor regulations

| <b>Single-factor regulations</b>                           | No. genes | <i>p-value</i> | Whether Cancer-related |
|------------------------------------------------------------|-----------|----------------|------------------------|
| Pathways in cancer                                         | 55        | 4.3E-04        | YES                    |
| MAPK signaling pathway                                     | 46        | 8.0E-04        | YES                    |
| Regulation of actin cytoskeleton                           | 42        | 9.4E-05        | NO                     |
| Neuroactive ligand-receptor interaction                    | 37        | 4.1E-02        | NO                     |
| Calcium signaling pathway                                  | 36        | 1.3E-04        | NO                     |
| Focal adhesion                                             | 33        | 1.0E-02        | NO                     |
| Lysosome                                                   | 27        | 1.5E-04        | NO                     |
| Neurotrophin signaling pathway                             | 21        | 3.0E-02        | NO                     |
| Arrhythmogenic right ventricular cardiomyopathy (ARVC)     | 20        | 2.3E-04        | NO                     |
| Oocyte meiosis                                             | 20        | 1.9E-02        | NO                     |
| Hypertrophic cardiomyopathy (HCM)                          | 18        | 6.0E-03        | NO                     |
| Prostate cancer                                            | 18        | 1.0E-02        | YES                    |
| Fc gamma R-mediated phagocytosis                           | 18        | 1.9E-02        | NO                     |
| Pancreatic cancer                                          | 17        | 2.0E-03        | YES                    |
| Colorectal cancer                                          | 17        | 1.3E-02        | YES                    |
| Dilated cardiomyopathy                                     | 17        | 2.9E-02        | NO                     |
| Melanogenesis                                              | 16        | 4.9E-02        | NO                     |
| Acute myeloid leukemia                                     | 15        | 2.0E-03        | YES                    |
| Long-term potentiation                                     | 15        | 1.0E-02        | NO                     |
| Cardiac muscle contraction                                 | 15        | 3.1E-02        | NO                     |
| ECM-receptor interaction                                   | 15        | 4.4E-02        | NO                     |
| <b>Multi-factor regulations</b>                            |           |                |                        |
| Pathways in cancer                                         | 59        | 2.8E-02        | YES                    |
| MAPK signaling pathway                                     | 56        | 1.0E-03        | YES                    |
| Focal adhesion                                             | 41        | 1.0E-02        | NO                     |
| Regulation of actin cytoskeleton                           | 39        | 4.8E-02        | NO                     |
| Wnt signaling pathway                                      | 36        | 1.2E-03        | YES                    |
| Endocytosis                                                | 34        | 4.7E-02        | NO                     |
| Cell cycle                                                 | 30        | 3.0E-03        | YES                    |
| Axon guidance                                              | 30        | 5.0E-03        | NO                     |
| Oocyte meiosis                                             | 26        | 7.9E-03        | NO                     |
| Vascular smooth muscle contraction                         | 26        | 1.0E-02        | NO                     |
| Lysosome                                                   | 25        | 3.0E-02        | NO                     |
| Epithelial cell signaling in Helicobacter pylori infection | 24        | 2.3E-05        | NO                     |
| T cell receptor signaling pathway                          | 24        | 2.2E-02        | YES                    |
| GnRH signaling pathway                                     | 22        | 2.6E-02        | YES                    |

|                           |    |         |     |
|---------------------------|----|---------|-----|
| DNA replication           | 21 | 4.8E-09 | YES |
| Vibrio cholerae infection | 21 | 3.3E-05 | NO  |
| Apoptosis                 | 21 | 1.4E-02 | YES |
| Melanogenesis             | 21 | 4.5E-02 | NO  |
| Colorectal cancer         | 20 | 2.0E-02 | YES |
| ErbB signaling pathway    | 20 | 2.8E-02 | YES |
| ECM-receptor interaction  | 19 | 3.8E-02 | NO  |

Table S3 Detailed information of genes involved in pathway enrichment analysis of the key regulation subtypes

| Regulation subtype                                         | Gene name                                                                                                                                                                                                                                                 |
|------------------------------------------------------------|-----------------------------------------------------------------------------------------------------------------------------------------------------------------------------------------------------------------------------------------------------------|
| <b>CNV/TF</b>                                              |                                                                                                                                                                                                                                                           |
| MAPK signaling pathway                                     | MAPKAPK5, GNA12, DUSP10, MAPKAPK3, CACNB2, CACNB3, NFKB1, FGF12, MAPKAPK2, DAXX, AKT1, MAP3K7, MAP3K6, TNFRSF1A, PAK2, MAPT, PPP3CB, PPP3CA, PRKACB, RAPGEF2, EGFR, TP53, FLNC, FLNA, CDC25B, NRAS, RPS6KA2, RRAS2, MAPK9, PLA2G6, MAPK8, MAPK8IP1, DUSP8 |
| Wnt signaling pathway                                      | CSNK1A1, PPP2R1A, CTBP2, ROCK1, BTRC, CAMK2G, TP53, SMAD4, TCF7L2, MAP3K7, CTNNBIP1, SFRP4, PPP3CB, MAPK9, MAPK8, WIF1, CAMK2B, PPP3CA, PRKACB, RUVBL1, NFATC3, APC, LRP5                                                                                 |
| Cell cycle                                                 | CDC7, YWHAZ, TP53, SMAD4, PRKDC, TTK, ANAPC10, CDC20, CHEK2, MCM3, MCM5, ATM, CDC25B, HDAC2, MCM7, PLK1, PCNA, BUB3                                                                                                                                       |
| DNA replication                                            | SSBP1, LIG1, POLA2, MCM3, RNASEH2A, MCM5, RPA1, POLD3, RFC4, MCM7, RFC1, RFC2, POLE3, POLD1, POLD2, PCNA                                                                                                                                                  |
| Spliceosome                                                | RBM22, NCBP2, PRPF31, NHP2L1, MAGOH, LSM7, TRA2A, PRPF4, BUD31, DDX23, DHX15, LSM5, HNRNPC, SNRPF, PRPF40A, THOC1                                                                                                                                         |
| Axon guidance                                              | GNAI3, ROCK1, LIMK2, ABLIM3, DPYSL2, CDK5, ITGB1, SLIT3, NRAS, PAK2, SEMA4F, NCK1, SRGAP3, PPP3CB, PPP3CA, NFATC3                                                                                                                                         |
| Apoptosis                                                  | CFLAR, TP53, NFKB1, CAPN2, ATM, CAPN1, AKT1, PRKAR2B, TNFRSF1A, PRKAR2A, CASP7, PRKAR1B, PPP3CB, PPP3CA, PRKACB                                                                                                                                           |
| T cell receptor signaling pathway                          | VAV3, MALT1, NFKB1, AKT1, MAP3K7, PRKCQ, NRAS, PAK2, PLCG1, NCK1, PPP3CB, MAPK9, PPP3CA, NFATC3                                                                                                                                                           |
| Vibrio cholerae infection                                  | KDEL2, ATP6V1H, PDIA4, ATP6V1B2, ATP6V1D, ATP6V0C, SEC61B, PLCG1, ATP6V1E1, PRKACB, SEC61G, SEC61A1, SEC61A2                                                                                                                                              |
| Mismatch repair                                            | POLD3, RPA1, MSH6, RFC4, RFC1, SSBP1, RFC2, POLD1, LIG1, POLD2, PCNA, MLH1                                                                                                                                                                                |
| Epithelial cell signaling in Helicobacter pylori infection | EGFR, ATP6V0C, PLCG1, ATP6V1E1, ADAM17, ATP6V1H, MAPK9, NFKB1, MAPK8, ATP6V1B2, CSK, ATP6V1D                                                                                                                                                              |
| <b>MiRNA/TF</b>                                            |                                                                                                                                                                                                                                                           |
| Pathways in cancer                                         | DVL2, COL4A2, BMP2, FGFR3, COL4A1, FGF9, FZD1, CDK2, FZD7, TCF7L1, MAPK1, ACVR1B, HSP90B1, HDAC2, ITGA6, VEGFA, LAMC1, MYC, TRAF4                                                                                                                         |
| Focal adhesion                                             | TLN1, COL4A2, VAV3, COL4A1, PPP1CB, COL5A1, PAK6, MAPK1, PAK7, ITGA6, PAK3, ITGB8, VEGFA, SHC1, PAK1, LAMC1, THBS1                                                                                                                                        |
| Regulation of                                              | GIT1, VAV3, FGFR3, FGF9, WASF1, RDX, ARHGEF12, PPP1CB,                                                                                                                                                                                                    |

|                                     |                                                                                                                 |
|-------------------------------------|-----------------------------------------------------------------------------------------------------------------|
| actin cytoskeleton                  | PAK6, MAPK1, PAK7, ITGA6, PAK3, TIAM1, ITGB8, ARPC5L, PAK1                                                      |
| MAPK signaling pathway              | FGFR3, FGF9, MAP2K3, MAPKAPK2, RPS6KA5, MAP4K3, ACVR1B, MAPK1, PPP3CB, PRKACA, PAK1, RAPGEF2, DUSP8, MYC, DUSP6 |
| Axon guidance                       | ABLIM1, NRP1, GNAI1, ARHGEF12, SLIT2, PAK6, PAK7, MAPK1, RND1, PAK3, SRGAP3, PPP3CB, PAK1                       |
| Wnt signaling pathway               | DVL2, PPP2R1A, CAMK2G, BTRC, FZD1, TCF7L1, FZD7, PPP2CB, PPP3CB, PRKACA, TBL1X, PLCB1, MYC                      |
| Oocyte meiosis                      | MAPK1, PPP2R1A, CAMK2G, BTRC, PPP2CB, PPP3CB, FBXO5, PRKACA, ESPL1, PPP1CB, SMC3, CDK2                          |
| Chemokine signaling pathway         | MAPK1, VAV3, LYN, GNAI1, TIAM1, GNB1, PRKACA, SHC1, CX3CL1, PAK1, PLCB1, CCNL2                                  |
| Melanogenesis                       | DVL2, MAPK1, GNAI1, CAMK2G, CREB3L2, FZD1, PRKACA, PLCB1, TCF7L1, FZD7                                          |
| Cell cycle                          | HDAC2, DBF4, PCNA, ESPL1, MCM2, MYC, SMC3, CDK2, WEE1, MCM6                                                     |
| Insulin signaling pathway           | MAPK1, PRKAR2A, SOCS2, TSC1, PHKA1, PRKACA, SHC1, RPS6KB1, TRIP10, PPP1CB                                       |
| <b>TF/methylation</b>               |                                                                                                                 |
| Vascular smooth muscle contraction  | MYL6, ADCY1, ADCY2, ADCY7, ARHGEF12, KCNMB1, ACTG2, MYL6B, PLA2G12A, PLA2G2A, PRKACB, CALCRL, PLA2G5, CALM1     |
| Oocyte meiosis                      | ADCY1, ADCY2, CCNB2, ADCY7, RPS6KA2, PPP3CB, FBXO5, ESPL1, ANAPC10, PRKACB, SMC3, CALM1                         |
| Antigen processing and presentation | HSPA2, PSME1, PSME2, TAP1, IFI30, HLA-C, CD4, HLA-E, CANX, CD74, B2M                                            |
| Dilated cardiomyopathy              | LAMA2, ADCY1, ADCY2, ADCY7, ITGA6, ITGAV, LMNA, CACNB2, CACNG2, PRKACB, TPM4                                    |
| Gap junction                        | ADCY1, ADCY2, ADCY7, GNAI1, GRB2, TUBB2A, TUBB6, PDGFD, PRKACB, TUBA1C                                          |
| DNA replication                     | PRIM1, RFC2, LIG1, POLD2, MCM2, RNASEH2A                                                                        |
| Type I diabetes mellitus            | CD86, GAD2, CPE, PTPRN2, HLA-C, HLA-E                                                                           |

### 3. Supplementary Figures

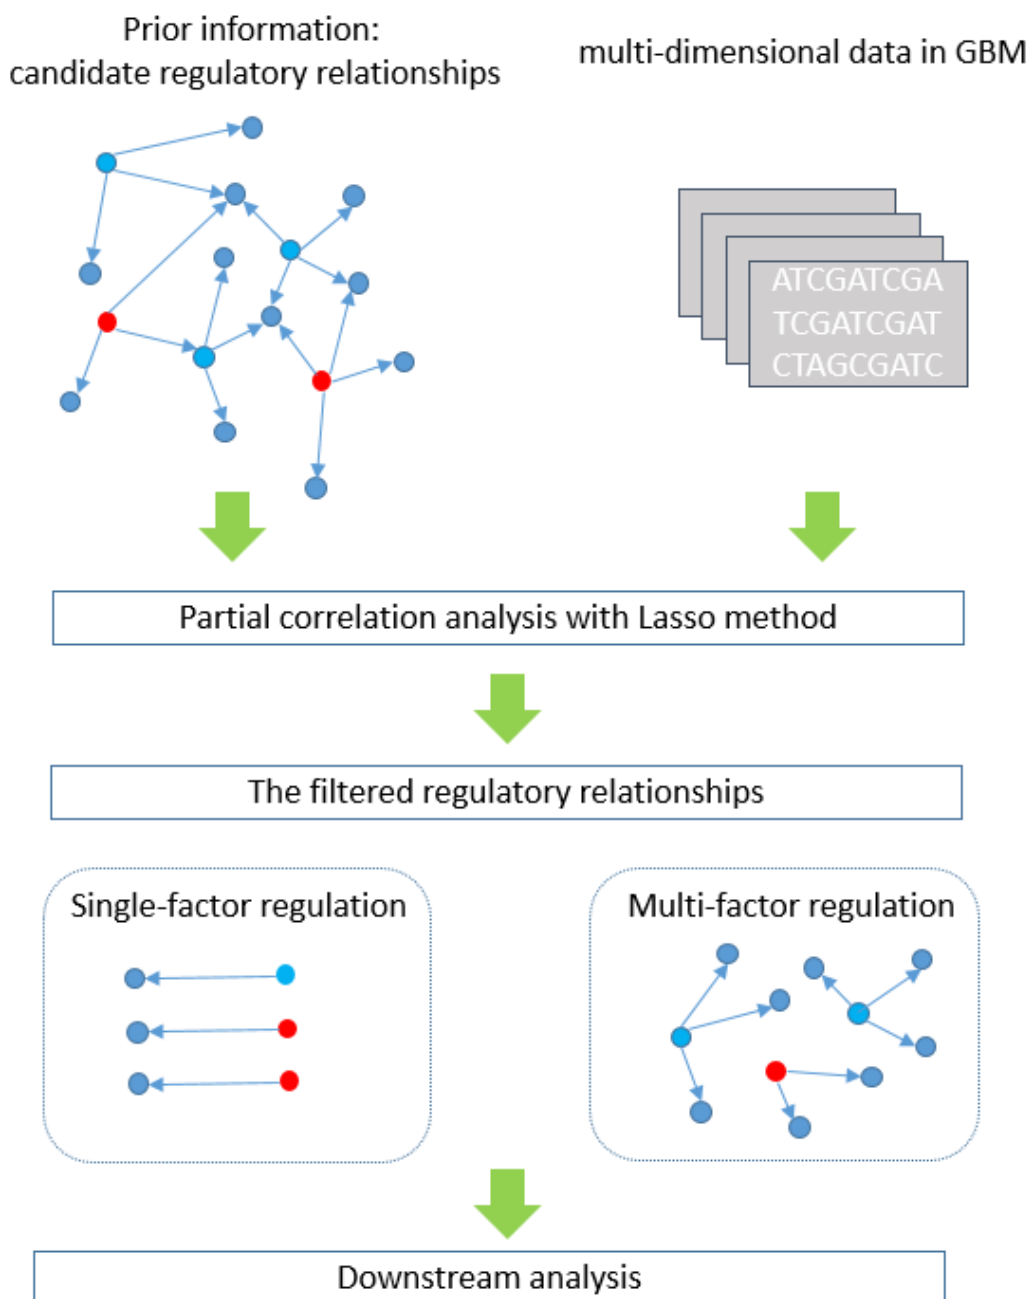

Figure S1 The flow chart of the filter process of prior regulatory relationships with partial correlation analysis with Lasso method.

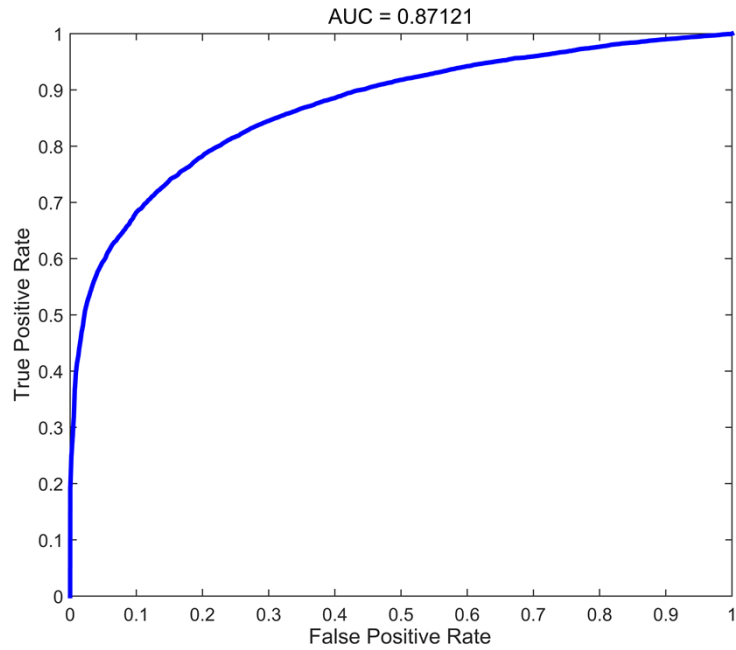

Figure S2 The ROC curve of the partial correlation analysis with Lasso method. X-axis and y-axis represent false positive rate and true positive rate, i.e.  $1-S_p$  and  $S_n$ , respectively. The AUC value is labeled on the top of the figure.

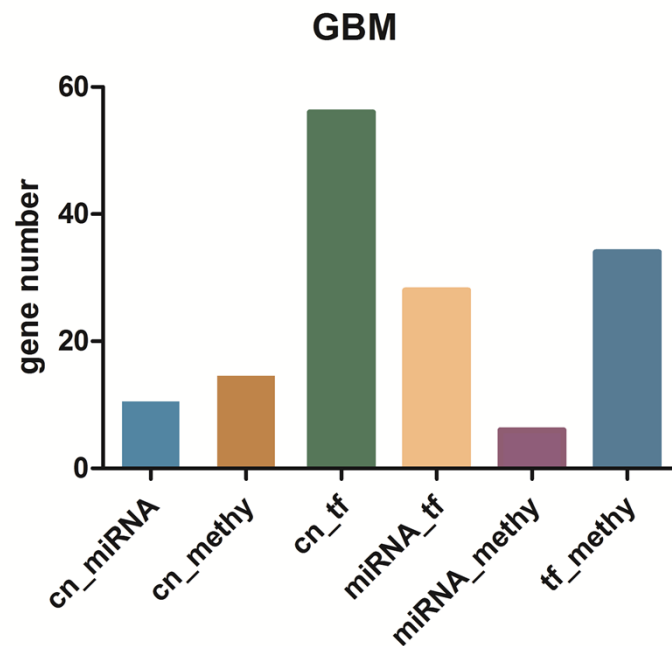

Figure S3 Distribution of regulation types of experimentally validated GBM-related genes appeared in multi-factor regulations



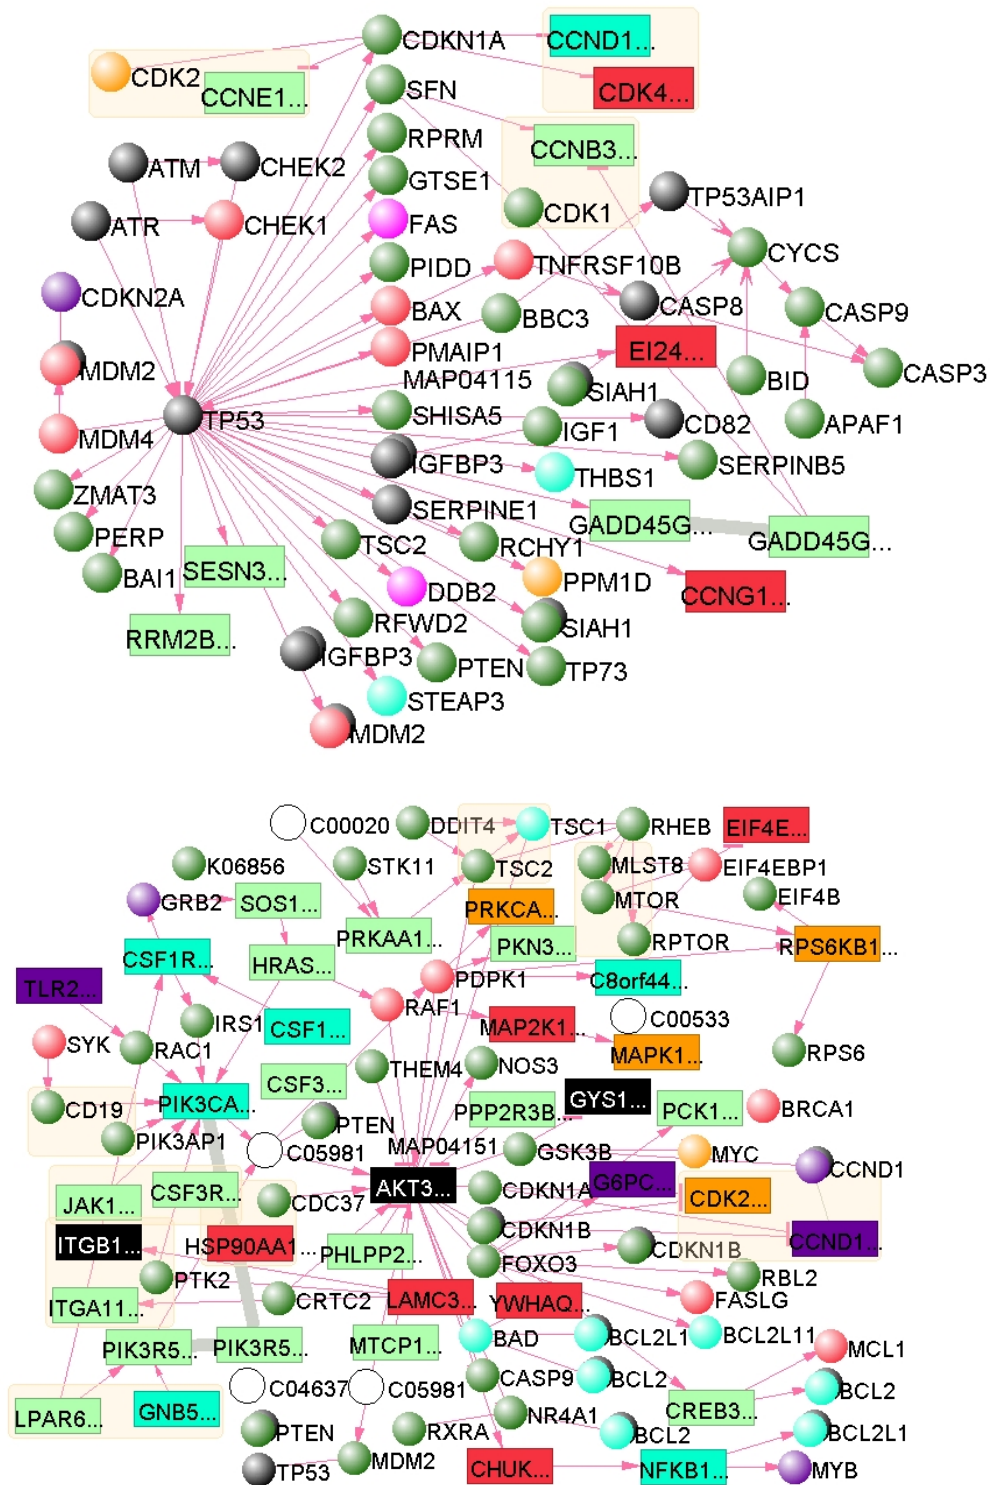

Figure S4 GBM-related P53 pathway (top) and PI3K-AKT pathway (bottom). The nodes are genes and rectangles are KEGG groups. Red, orange, black, purple, blue and pink represent single-factor, miRNA/TF, CNV/TF, TF/methy, CNV/methy and CNV/miRNA regulation, respectively. Here “methylation” and “copy number variation” is abbreviated to “methy” and “CNV” for convenience.
